# Supplementary material
Source: PubMed Central journal article supplement (PMC6086163)
Supplement: tpmd170929.SD1.pdf [file tpmd170929.SD1.pdf]

# Revisa y avisa para vivir sin cisticercosis "Triquina"

| MAYO 2014 |    |    |    |    |    |    |
|-----------|----|----|----|----|----|----|
| D         | L  | M  | J  | V  | S  |    |
|           |    |    | 1  | 2  | 3  |    |
| 4         | 5  | 6  | 7  | 8  | 9  | 10 |
| 11        | 12 | 13 | 14 | 15 | 16 | 17 |
| 18        | 19 | 20 | 21 | 22 | 23 | 24 |
| 25        | 26 | 27 | 28 | 29 | 30 | 31 |

| JUNIO 2014 |    |    |    |    |    |    |
|------------|----|----|----|----|----|----|
| D          | L  | M  | J  | V  | S  |    |
| 29         | 30 |    |    |    |    |    |
| 1          | 2  | 3  | 4  | 5  | 6  | 7  |
| 8          | 9  | 10 | 11 | 12 | 13 | 14 |
| 15         | 16 | 17 | 18 | 19 | 20 | 21 |
| 22         | 23 | 24 | 25 | 26 | 27 | 28 |

| JULIO 2014 |    |    |    |    |    |    |
|------------|----|----|----|----|----|----|
| D          | L  | M  | J  | V  | S  |    |
|            |    |    | 1  | 2  | 3  | 4  |
| 5          | 6  | 7  | 8  | 9  | 10 | 11 |
| 12         | 13 | 14 | 15 | 16 | 17 | 18 |
| 19         | 20 | 21 | 22 | 23 | 24 | 25 |
| 26         | 27 | 28 | 29 | 30 | 31 |    |

| AGOSTO 2014 |    |    |    |    |    |    |
|-------------|----|----|----|----|----|----|
| D           | L  | M  | J  | V  | S  |    |
| 31          |    |    |    |    |    |    |
| 1           | 2  | 3  | 4  | 5  | 6  | 7  |
| 8           | 9  | 10 | 11 | 12 | 13 | 14 |
| 15          | 16 | 17 | 18 | 19 | 20 | 21 |
| 22          | 23 | 24 | 25 | 26 | 27 | 28 |
| 29          | 30 | 31 |    |    |    |    |




**Revisa al chancho si tiene bolitas de triquina en la lengua, antes de venderlo o al comprarlo.**




| SEPTIEMBRE 2014 |    |    |    |    |    |    |
|-----------------|----|----|----|----|----|----|
| D               | L  | M  | J  | V  | S  |    |
| 1               | 2  | 3  | 4  | 5  | 6  | 7  |
| 8               | 9  | 10 | 11 | 12 | 13 | 14 |
| 15              | 16 | 17 | 18 | 19 | 20 | 21 |
| 22              | 23 | 24 | 25 | 26 | 27 | 28 |
| 29              | 30 |    |    |    |    |    |

| OCTUBRE 2014 |    |    |    |    |    |    |
|--------------|----|----|----|----|----|----|
| D            | L  | M  | J  | V  | S  |    |
|              |    |    | 1  | 2  | 3  | 4  |
| 5            | 6  | 7  | 8  | 9  | 10 | 11 |
| 12           | 13 | 14 | 15 | 16 | 17 | 18 |
| 19           | 20 | 21 | 22 | 23 | 24 | 25 |
| 26           | 27 | 28 | 29 | 30 | 31 |    |

| NOVIEMBRE 2014 |    |    |    |    |    |    |
|----------------|----|----|----|----|----|----|
| D              | L  | M  | J  | V  | S  |    |
| 30             |    |    |    |    |    |    |
| 1              | 2  | 3  | 4  | 5  | 6  | 7  |
| 8              | 9  | 10 | 11 | 12 | 13 | 14 |
| 15             | 16 | 17 | 18 | 19 | 20 | 21 |
| 22             | 23 | 24 | 25 | 26 | 27 | 28 |
| 29             | 30 |    |    |    |    |    |

| DICIEMBRE 2014 |    |    |    |    |    |    |
|----------------|----|----|----|----|----|----|
| D              | L  | M  | J  | V  | S  |    |
| 1              | 2  | 3  | 4  | 5  | 6  | 7  |
| 8              | 9  | 10 | 11 | 12 | 13 | 14 |
| 15             | 16 | 17 | 18 | 19 | 20 | 21 |
| 22             | 23 | 24 | 25 | 26 | 27 | 28 |
| 29             | 30 | 31 |    |    |    |    |

2014 - 2015

**Avisa inmediatamente a tu establecimiento de salud.**

Recuerda: Un Chancho sano, es la mejor forma de ahorrar y cuidar tu salud...

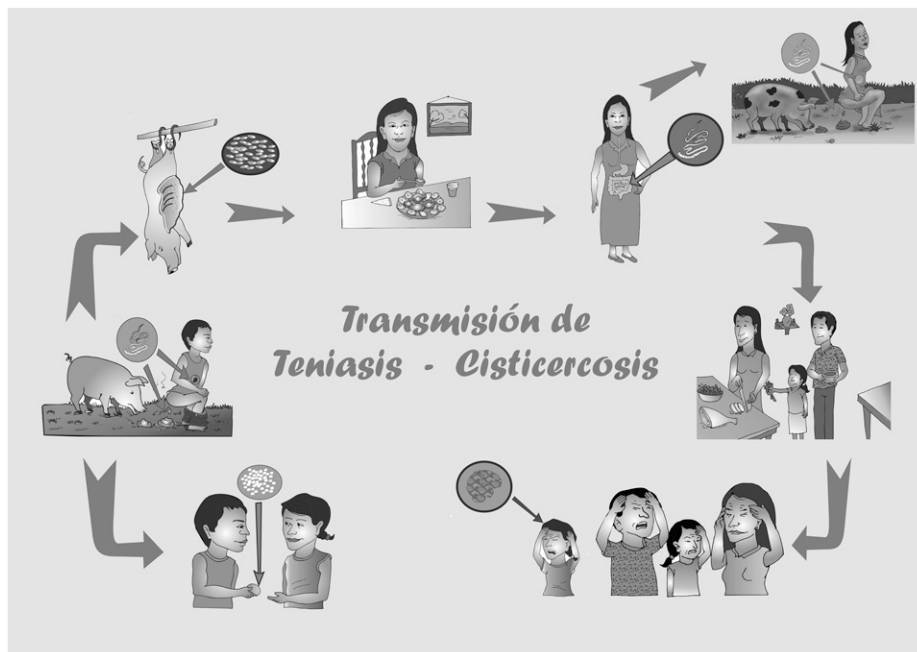

# ¿CÓMO ACTUAR PARA VIVIR SIN CISTICERCOSIS "TRIQUINA"?

## RECUERDA QUE:

PREVENIR ES LA MEJOR FORMA DE AHORRAR  
POR ESO:

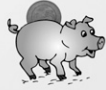

Al chanco antes de vender o comprar, siempre la lengua debes revisar, si boñitas de triquina encuentras, de inmediato a tu establecimiento de salud debes avisar.

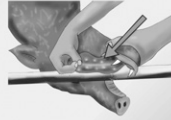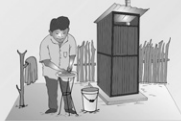

Hacer las deposiciones en baños, sítos o letrinas seguras.  
Lavarse las manos: después de salir del baño, antes de cocinar y antes de comer.

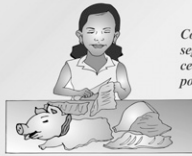

Consumir carne de chanco segura: congelarla, cecinarla y cocinarla por mas de 15 minutos.

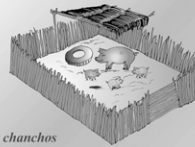

Criar chanchos en corrales seguros.

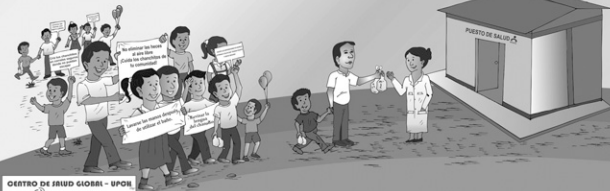

CENTRO DE SALUD GIORRI - UPON  
Ministerio de Promoción Regional Salud  
PUNO

Si tienes consultas llamar a los teléfonos: 997595165 / 997531884

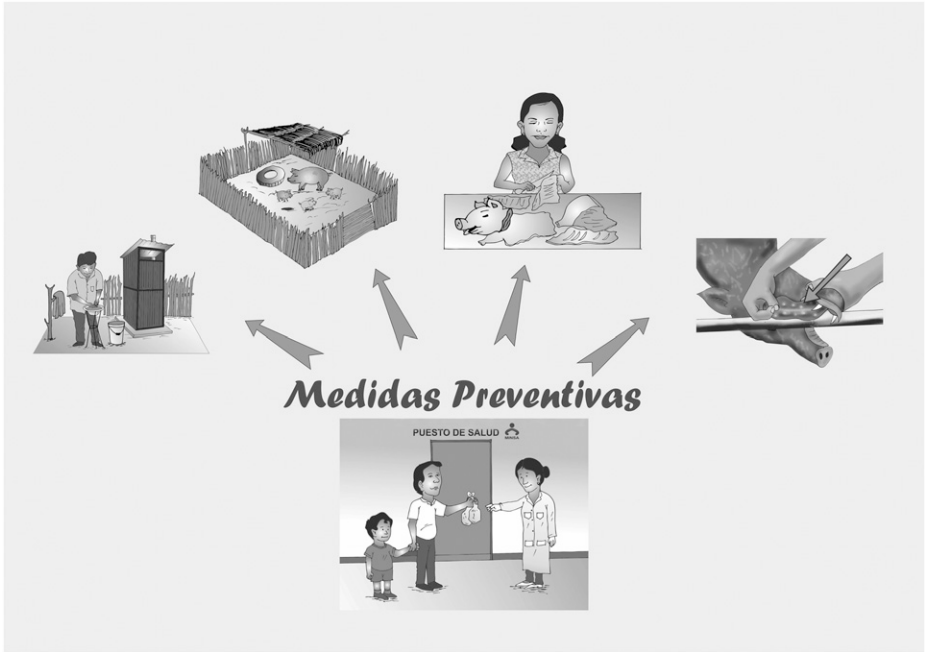

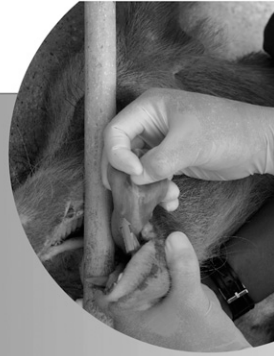

## El examen de lengua, es un modo casero de saber si el chancho tiene cisticercosis "Triquina".

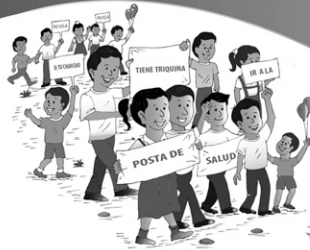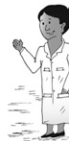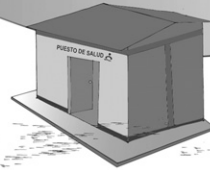

Evita que tu familia se contagie de solitaria y triquina, avisa de inmediato a tu establecimiento de salud.

Si la Cisticercosis queremos evitar, la prevención debemos practicar...

### Recomendaciones:

- **Uso de letrinas, silos o baños seguros.**
- **Lavarse las manos con agua y jabón:**
  - Después de salir del baño.
  - Antes de preparar alimentos.
  - Antes de comer.

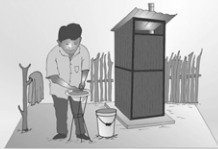

Cria a tus chanchos en corrales seguros, para que no se escapen.

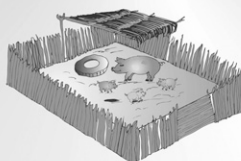

- Consumir preferentemente carne de chancho criados en corrales seguros.
- Cecinar la carne lo mas fina posible.
- Congelar la carne o cocinar por más de 15 minutos..

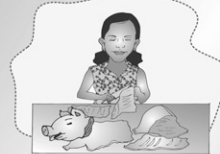

Revisa al chancho antes de venderlo o comprarlo; fijate si tiene bolitas de triquina debajo de la lengua y si tuviera avisa inmediatamente a tu establecimiento de salud de tu comunidad.

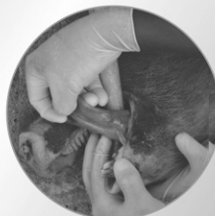

## ¿Ganancia o pérdida?

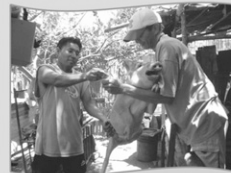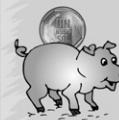

### RECUERDA QUE:

PREVENIR ES LA MEJOR FORMA DE AHORRAR Y CUIDAR TU SALUD.

Evita que tu familia se contagie de solitaria y triquina; revisa y avisa cuando veas un chancho con triquina...

Si tienes consultas lo puedes hacer al :  
997595165 - 997531884

El chanco representa un ahorro para el hogar y muchas veces nos saca de apuro, se vende rápido y pagan en efectivo.

El chanco que se cría suelto, por sus hábitos alimenticios come las heces de las personas.

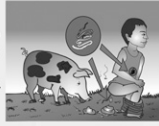

Recuerda que tu chanchito suelto se puede contagiar de cisticercosis "Triquina".

¿Por qué se enferman los chanchos con Cisticercosis (Triquina).

SOLO por comer las heces de las personas que tienen un parásito llamado Tenia Solitaria.

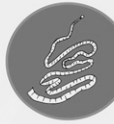

La solitaria adulta vive solo en el intestino de las personas, es parecido a un fideo tallarin plano color perla. Sale por trozos en las heces, eliminando huevos que a simple vista no se ven.

"Las personas que hacen a campo abierto y los chanchos sueltos son un peligro para la salud"

¿Qué sucede cuando el chanco come los huevos de la solitaria?

Los huevos se convierten en larvas, que se ven en la carne del chanco como unas bolsitas con agua, que contienen a una solitaria.

A esto se le llama CISTICERCOSIS porcina.

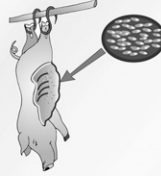

Si las personas consumen carne con triquina ¿Qué ocurre?

Estas bolsitas se revientan en el intestino y sale la larva de la solitaria que crece hasta convertirse en adulta.

....Así como el chanco se enfermó con Cisticercosis "triquina". Las personas también se pueden enfermar con Cisticercosis.

¿Cómo las personas se enferman de Cisticercosis "triquina"?

A través de alimentos contaminados con huevos de la solitaria, que ingresan por la boca, llegan al estómago e intestino y viajan por la sangre.

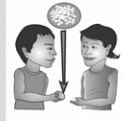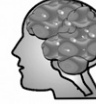

Llegando preferentemente a los músculos, ojos y cerebro produciendo la CISTICERCOSIS HUMANA.

Ocasionando muchas veces:

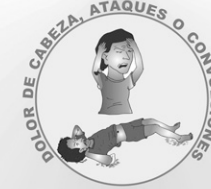

Esto afecta la salud, el trabajo y el costo para tratar la enfermedad es alto; causando importantes pérdidas económicas para el hogar.
